# Supplementary material
Source: PubMed Central journal article supplement (PMC4306526)
Supplement: jf504737f_si_001.pdf [file jf504737f_si_001.pdf]

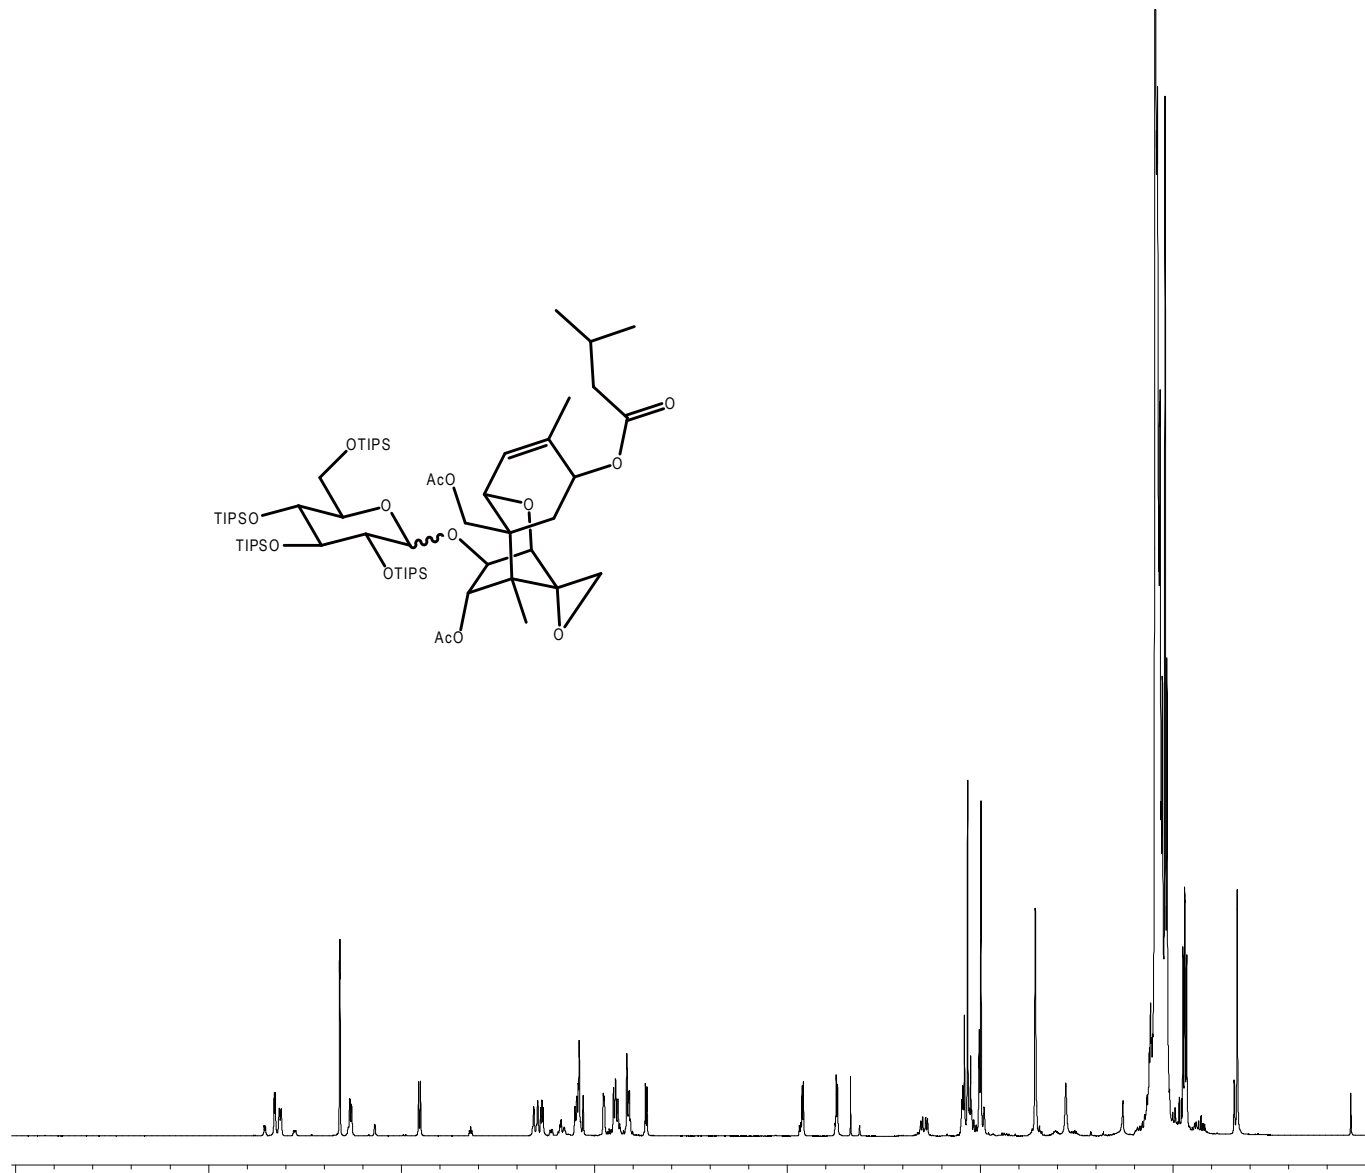

Figure S1. Proton NMR spectrum of tetra-*O*-TIPS- $\beta$ -glucosyl T-2 toxin, **6**, with 17% of tetra-*O*-TIPS- $\alpha$ -glucosyl T-2 toxin.

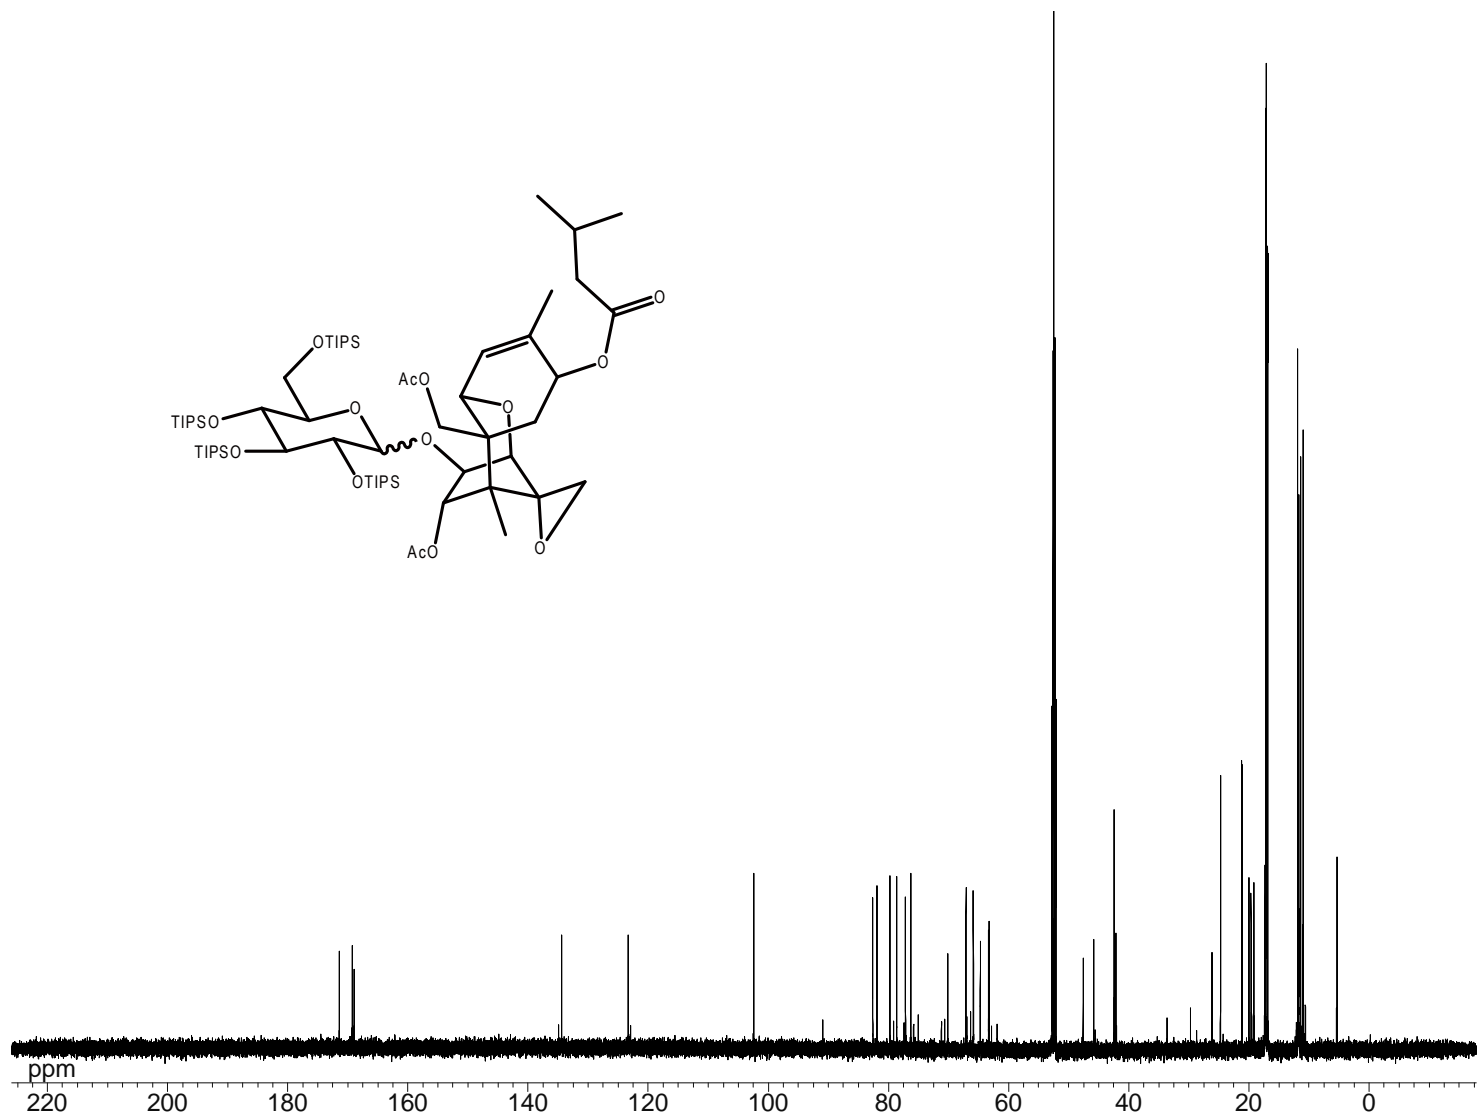

Figure S2. Carbon-13 NMR spectrum of tetra-*O*-TIPS- $\beta$ -glucosyl T-2 toxin, **6**, with 17% of tetra-*O*-TIPS- $\alpha$ -glucosyl T-2 toxin.

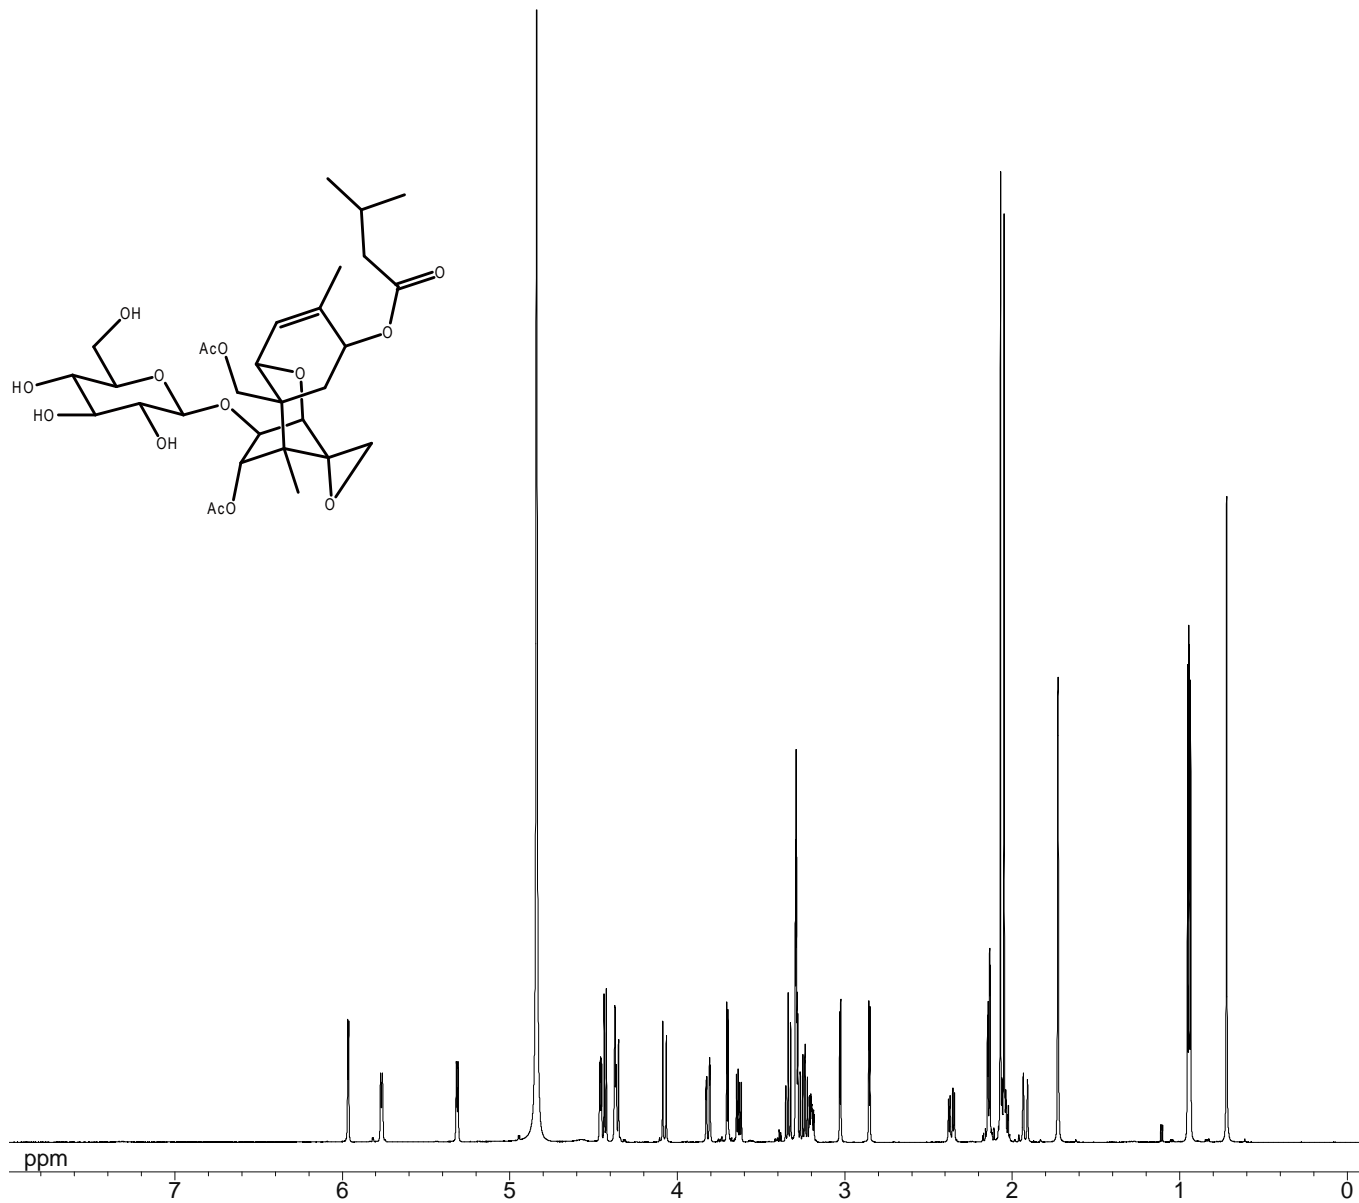

Figure S3. Proton NMR spectrum of T-2 toxin  $\beta$ -glucoside, **3**.

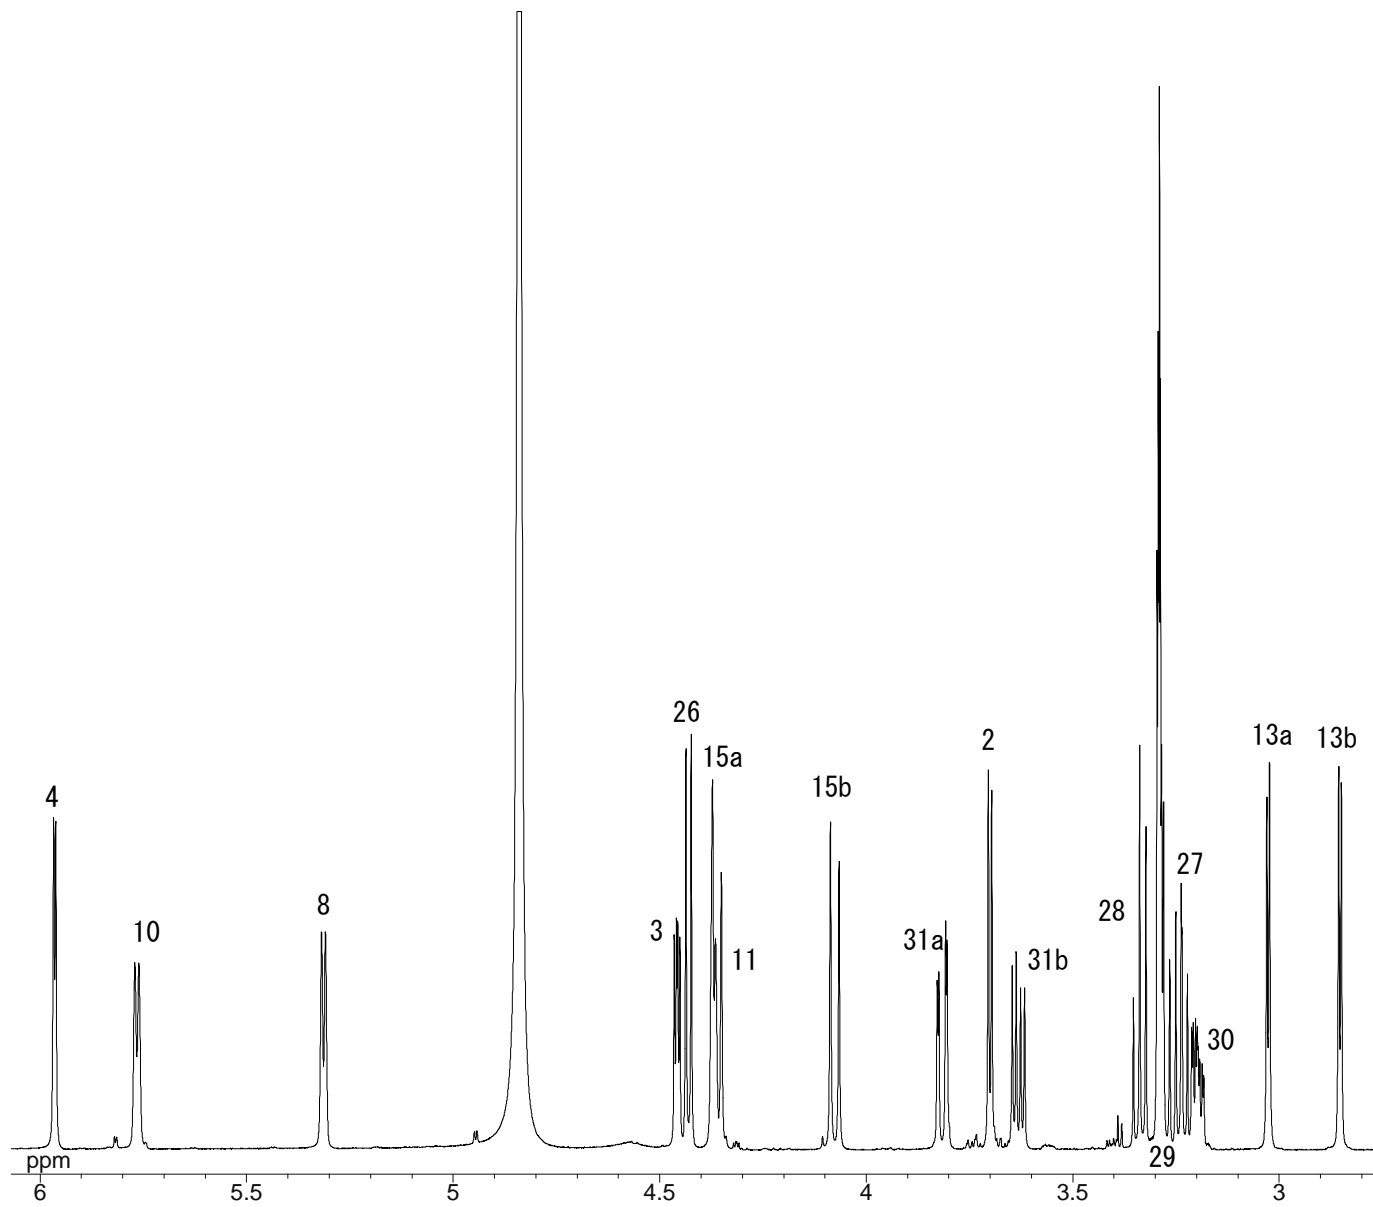

Figure S4. Proton NMR spectrum of T-2 toxin  $\beta$ -glucoside, **3**, from 6 ppm to 2.8 ppm.

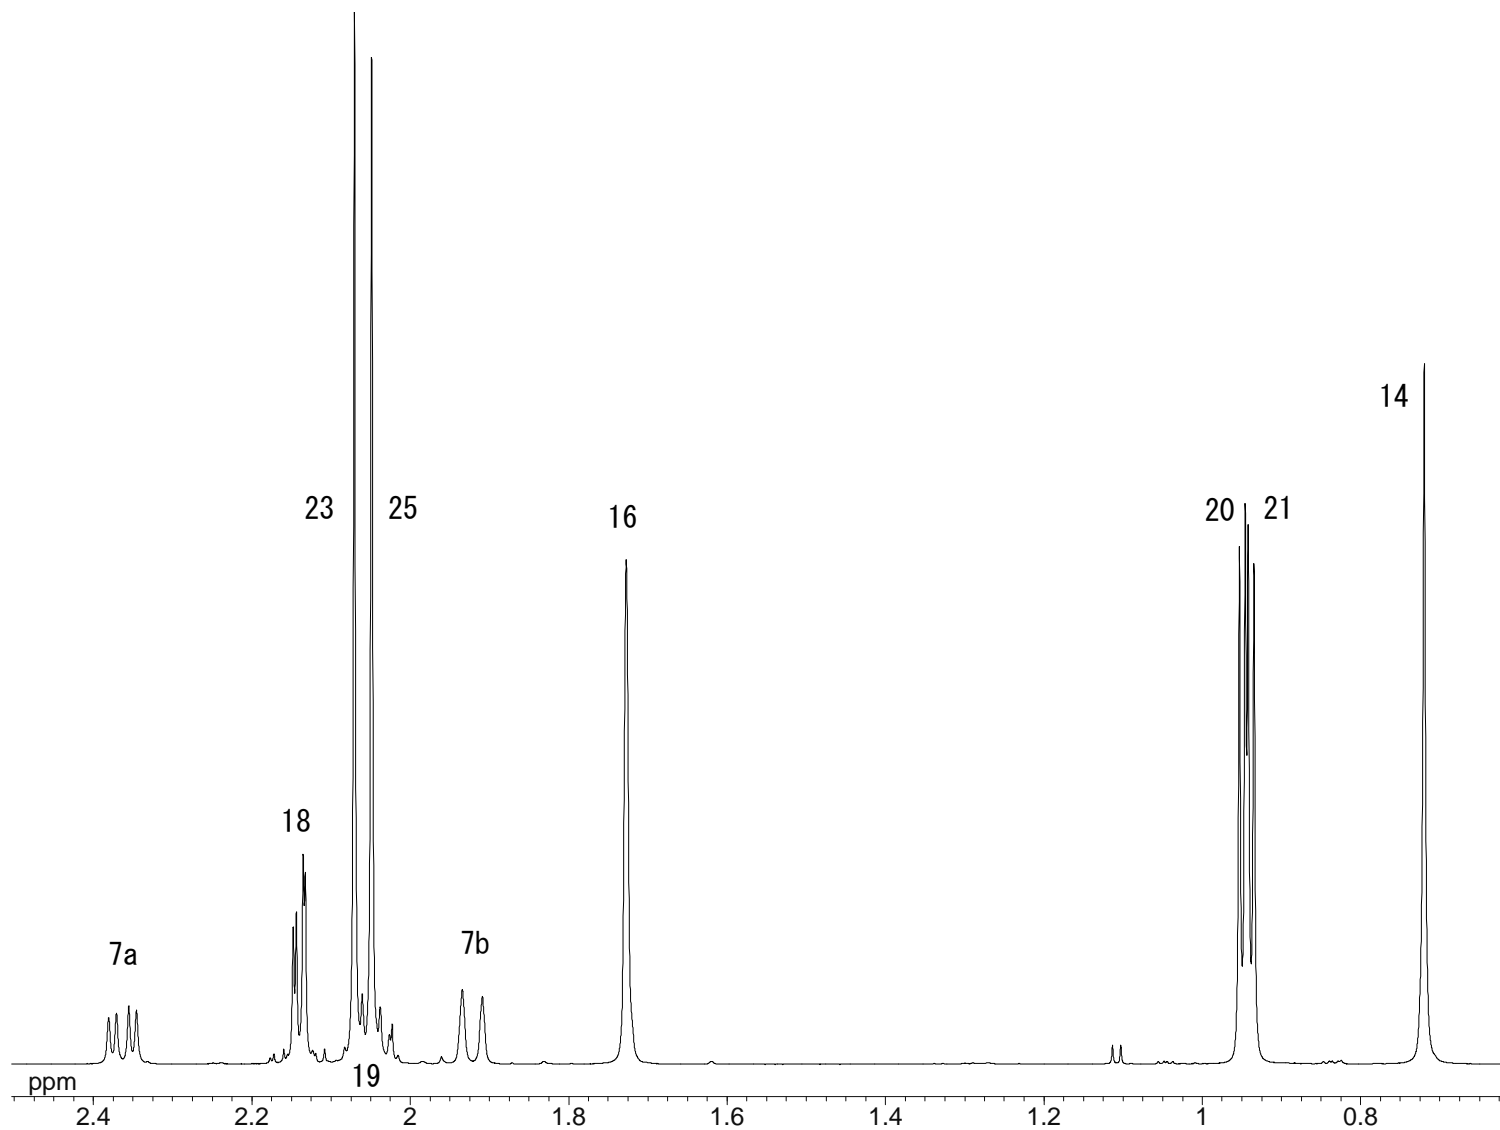

Figure S5. Proton NMR spectrum of T-2 toxin  $\beta$ -glucoside, **3**, from 2.5 ppm to 0.6 ppm.

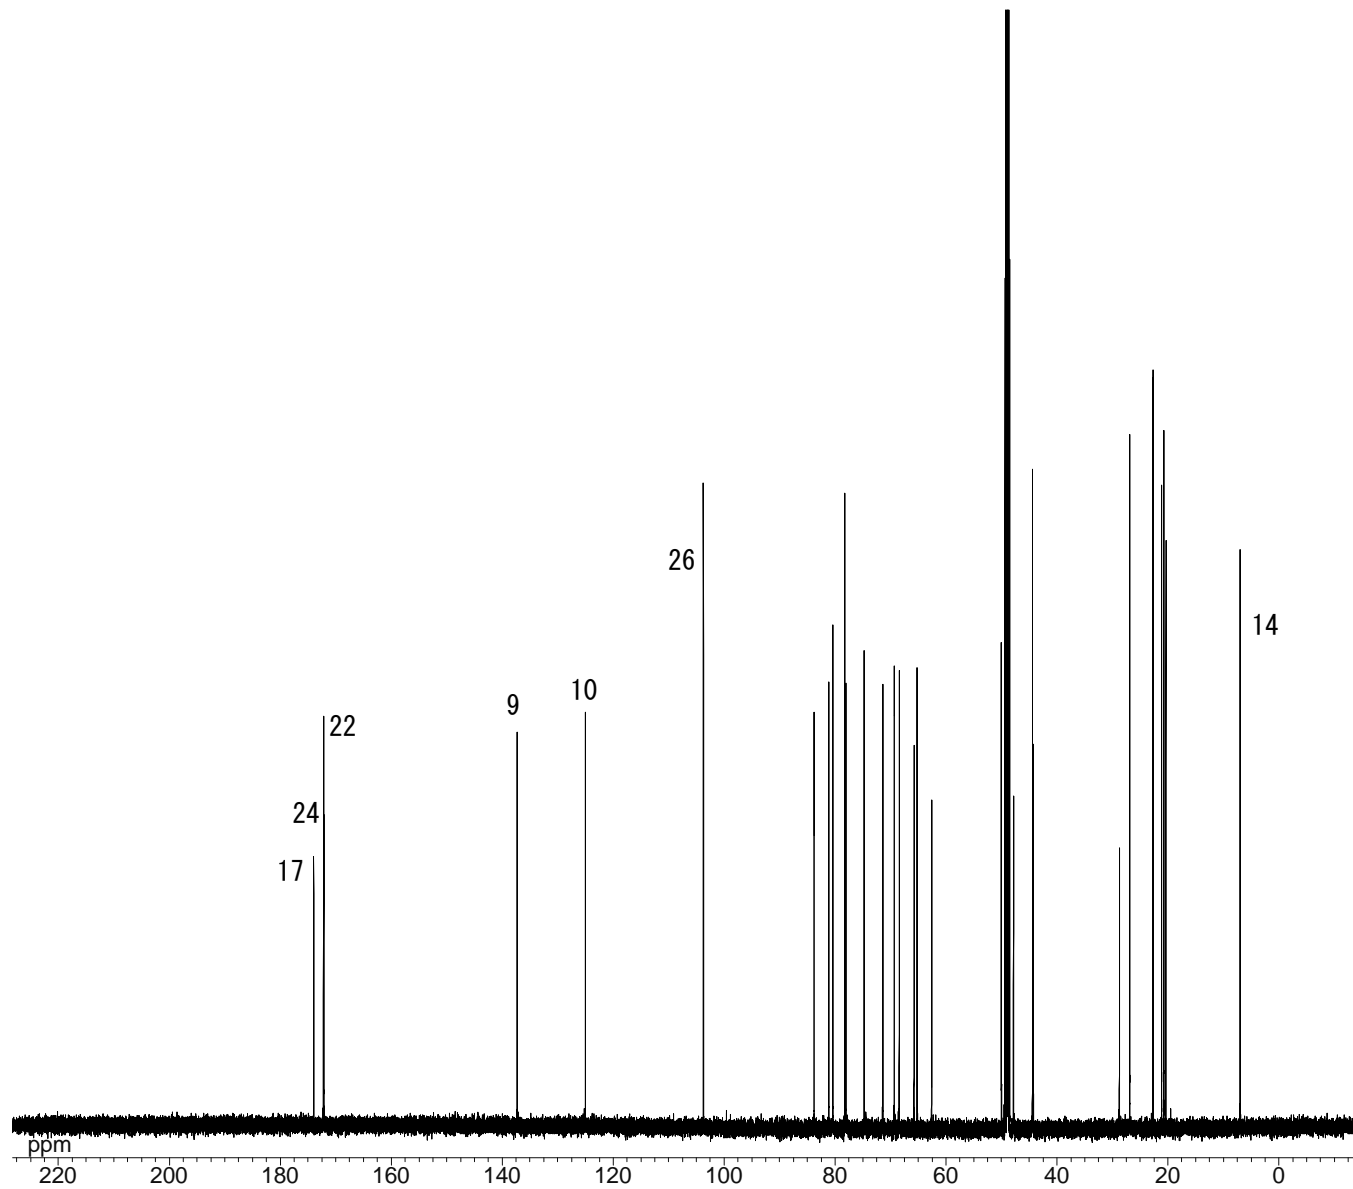

Figure S6. Carbon-13 NMR spectrum of T-2 toxin β-glucoside, **3**.

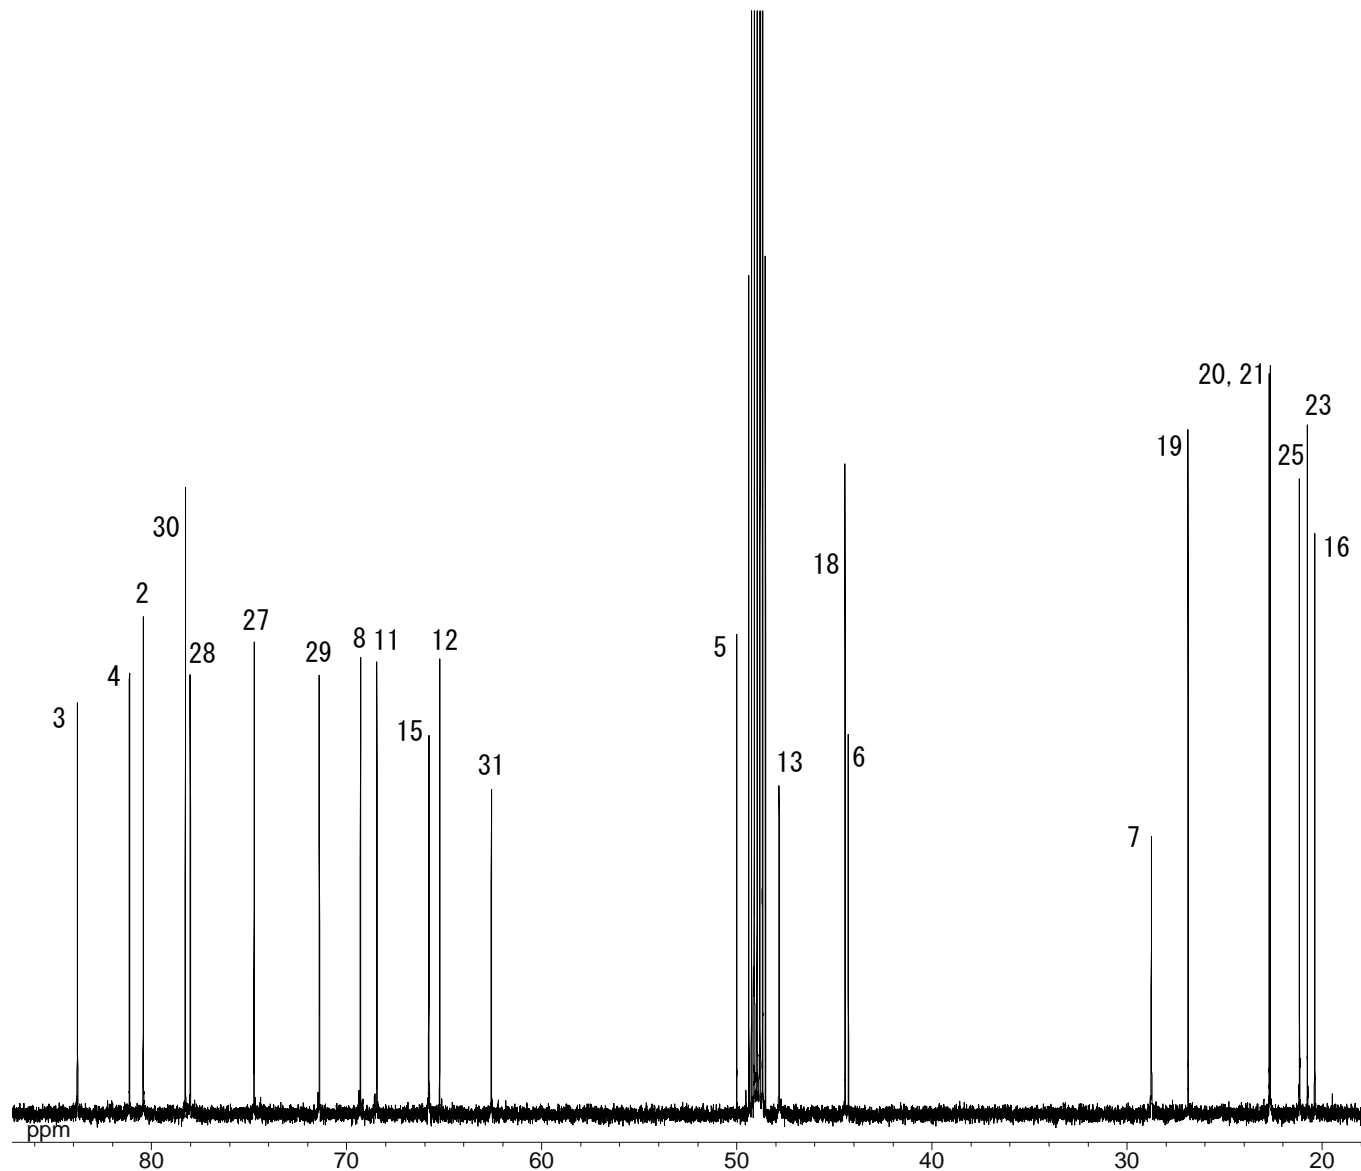

Figure S7. Carbon-13 NMR spectrum of T-2 toxin  $\beta$ -glucoside, **3**, from 20 ppm to 85 ppm

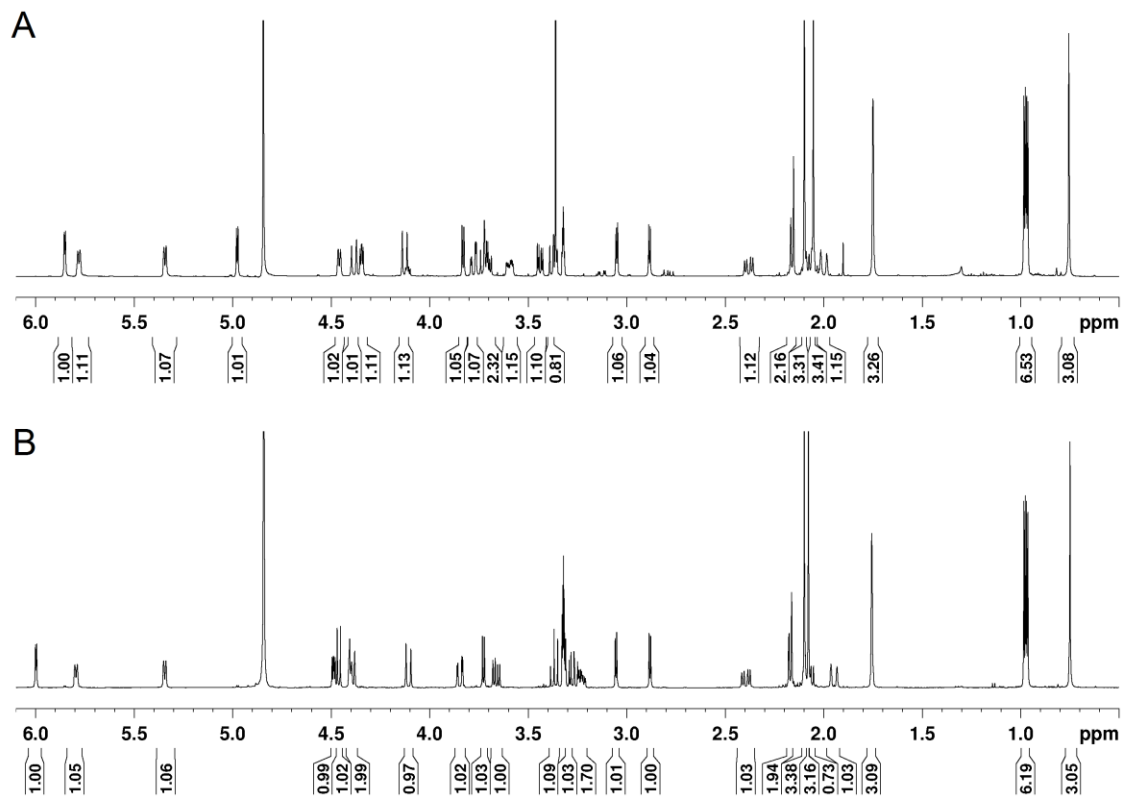

Figure S8. Proton NMR comparison of: A. T-2 toxin  $\alpha$ -glucoside, **2**, and B. T-2 toxin  $\beta$ -glucoside, **3**.



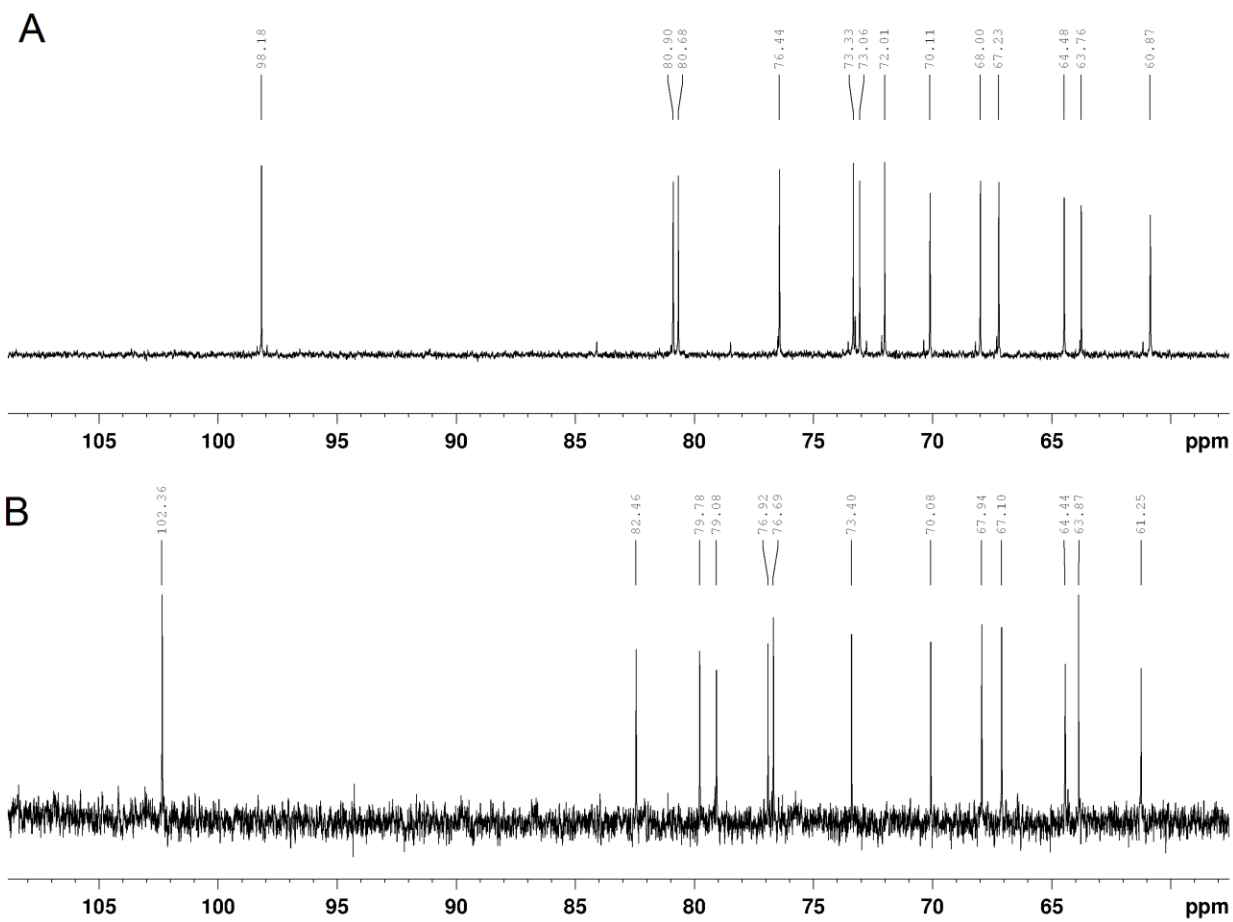

Figure S9. Carbon-13 NMR comparison of: A. T-2 toxin  $\alpha$ -glucoside, **2**, and B. T-2 toxin  $\beta$ -glucoside, **3**.

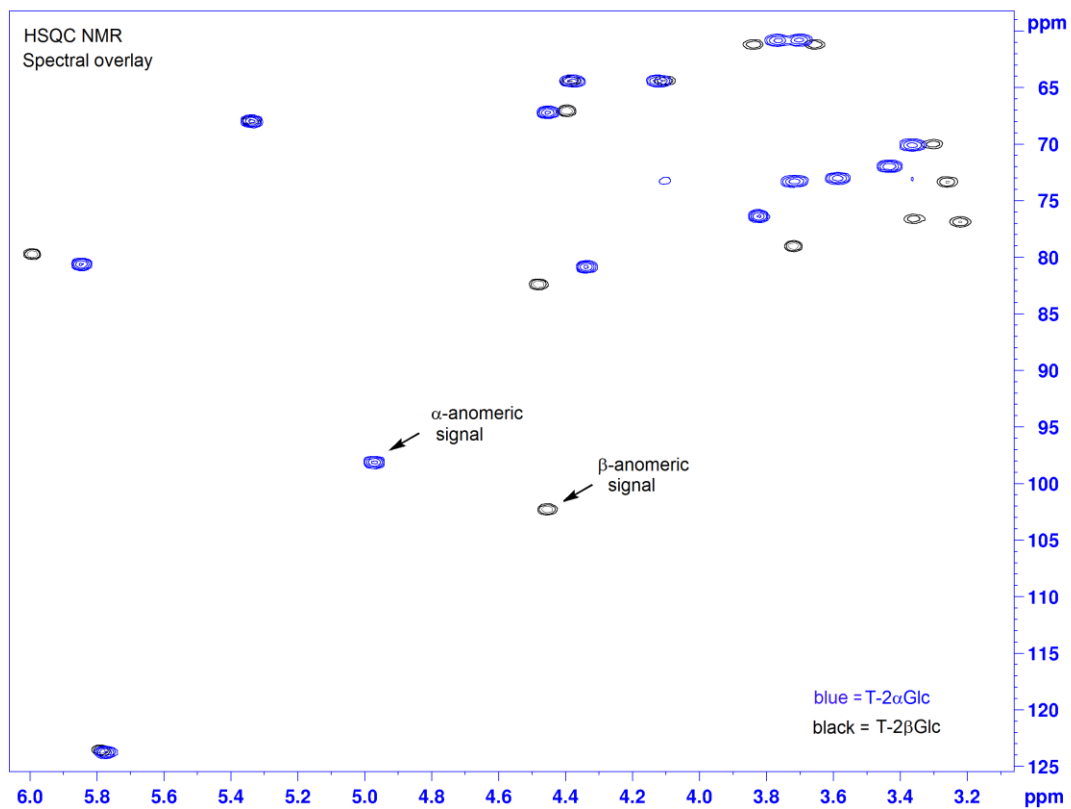

Figure S10. Overlaid HSQC-NMR spectra of the T-2 toxin  $\alpha$ -glucoside, 2, (blue) and T-2 toxin  $\beta$ -glucoside, 3, (black). The  $\alpha$ - and  $\beta$ -anomeric signals are as labeled.

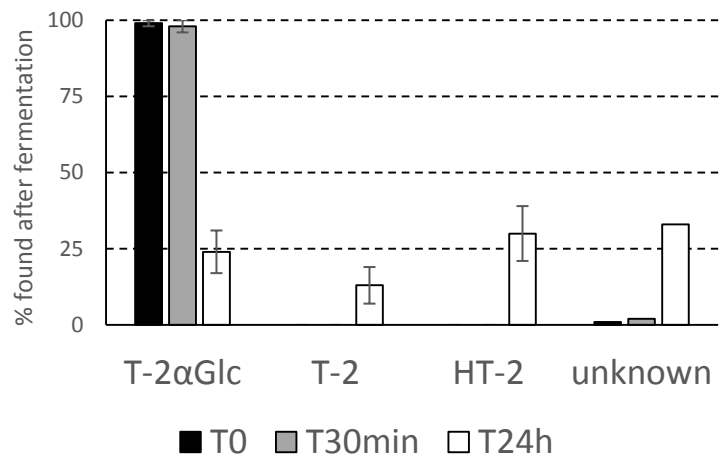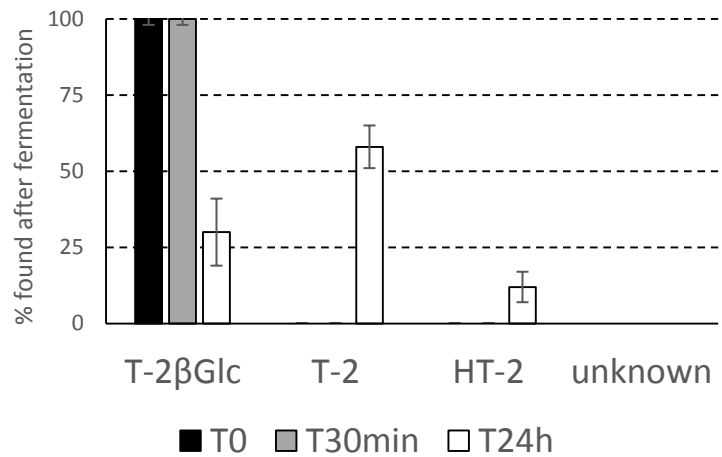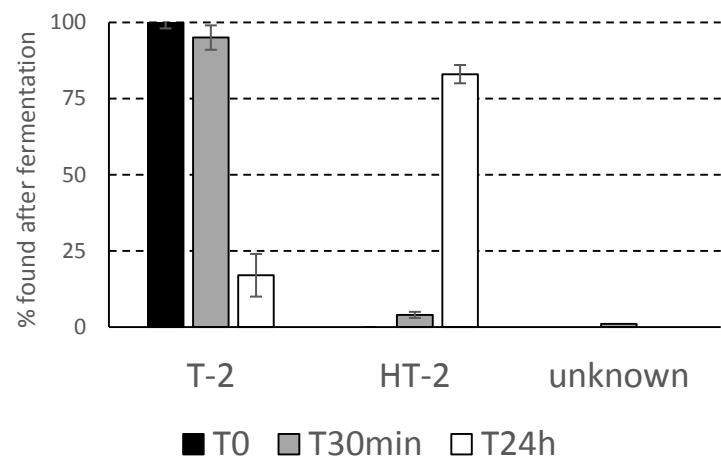

Figure S11. Degradation of: A. T-2 toxin  $\alpha$ -glucoside, 2, B. T-2 toxin  $\beta$ -glucoside, 3, and C. T-2 toxin, upon human colonic microbiota fermentation.
